# Supplementary material for: Chemical Characterization and Quality Assessment of Copaiba Oil-Resin Using GC/MS and SFC/MS
Source: MDPI journal article supplement (doi:10.3390/plants12081619), 2023-04-11
Supplement: s1 [file s1]

## **Supplementary Materials**

### **Chemical Characterization and Quality Assessment of Copaiba Oil-Resin Using GC/MS and SFC/MS**

Joseph Lee<sup>1</sup>, Mei Wang<sup>2\*</sup>, Jianping Zhao<sup>1</sup>, Zulficar Ali<sup>1</sup>, Mohammed F. Hawwal<sup>3</sup>, Ikhlas A. Khan<sup>1,4\*</sup>

<sup>1</sup>National Center for Natural Products Research, School of Pharmacy, University of Mississippi, University, MS, 38677, USA

<sup>2</sup>Natural Products Utilization Research Unit, Agricultural Research Service, U.S. Department of Agriculture, University, MS, 38677, USA

<sup>3</sup>Department of Pharmacognosy, College of Pharmacy, King Saud University, Riyadh 4545, Saudi Arabia

<sup>4</sup>Division of Pharmacognosy, Department of BioMolecular Sciences, School of Pharmacy, University of Mississippi, University, MS, 38677, USA

**Table S1** Tentative compound identification and concentration (peak area %) of Copaiba oil-resin.

| No.   | Compound <sup>a</sup>  | RRI <sup>Cal</sup> | RRI <sup>Lit</sup> | 613               | 614   | 615   | 616   | 860   | 327             | 617   | 618   | 621   | 622   | 623   | 624   | 625   | 626   |
|-------|------------------------|--------------------|--------------------|-------------------|-------|-------|-------|-------|-----------------|-------|-------|-------|-------|-------|-------|-------|-------|
|       |                        |                    |                    | Authentic Samples |       |       |       |       | Unknown Samples |       |       |       |       |       |       |       |       |
| 1     | δ-Elemene              | 1342               | 1338               | 1.92              | 1.00  | 0.84  | 0.99  | 0.99  | 0.36            | 2.25  | 0.90  | 0.20  | 1.02  | 0.83  | 1.29  | 1.59  | 2.10  |
| 2     | α-Cubebene             | 1355               | 1351               | 1.45              | 0.69  | 0.65  | 0.70  | 0.68  | 0.50            | 1.91  | 0.13  | -     | 0.71  | 0.05  | 0.74  | 1.19  | 1.44  |
| 3     | α-Ylangene             | 1379               | 1375               | 0.25              | 0.19  | 0.13  | 0.19  | 0.16  | 0.09            | 0.27  | 0.42  | 0.15  | 0.13  | 0.51  | 0.63  | 0.24  | 0.25  |
| 4     | α-Copaene              | 1384               | 1376               | 11.25             | 9.27  | 7.33  | 9.29  | 9.24  | 5.36            | 11.25 | 9.57  | 3.66  | 7.84  | 7.14  | 10.11 | 11.96 | 10.52 |
| 5     | 7-epi-Sesquithujene    | 1395               | 1391               | 0.21              | 0.14  | 0.14  | 0.13  | 0.12  | 0.12            | 0.17  | 0.25  | 0.03  | 0.15  | 0.16  | 0.16  | 0.16  | 0.12  |
| 6     | β-Elemene              | 1399               | 1390               | 1.85              | 1.93  | 1.43  | 1.94  | 1.92  | 0.87            | 1.95  | 1.20  | 0.47  | 1.55  | 1.24  | 1.23  | 2.23  | 1.80  |
| 7     | Cyperene               | 1409               | 1398               | 0.70              | 0.80  | 0.64  | 0.80  | 0.80  | 0.31            | 0.60  | 0.59  | 0.16  | 0.62  | 0.62  | 0.64  | 0.73  | 0.72  |
| 8     | α-Cedrene              | 1419               | 1411               | 0.20              | 0.20  | 0.19  | 0.20  | 0.15  | -               | 0.15  | 0.20  | 0.11  | 0.21  | 0.17  | 0.14  | 0.21  | 0.18  |
| 9     | β-Caryophyllene        | 1427               | 1419               | 38.58             | 45.68 | 42.77 | 45.77 | 45.76 | 43.46           | 39.56 | 35.49 | 67.71 | 44.93 | 41.29 | 39.35 | 45.85 | 41.42 |
| 10    | cis-β-Copaene          | 1433               | 1432               | 0.31              | 0.23  | 0.23  | 0.22  | 0.22  | 0.12            | 0.21  | 0.46  | 0.21  | 0.20  | 0.74  | 0.94  | 0.17  | 0.16  |
| 11    | γ-Elemene              | 1435               | 1436               | 1.46              | 1.82  | 1.79  | 1.85  | 1.86  | -               | 1.68  | 1.92  | 0.56  | 1.58  | 1.68  | 1.65  | 1.36  | 1.21  |
| 12    | trans-α-Bergamotene    | 1437               | 1434               | 7.87              | 7.55  | 8.31  | 7.57  | 7.58  | 6.57            | 6.88  | 7.53  | 3.46  | 8.32  | 6.70  | 4.75  | 6.96  | 6.32  |
| 13    | Aromandendrene         | 1443               | 1441               | 0.44              | 0.37  | 0.42  | 0.37  | 0.38  | 0.43            | 0.36  | 0.48  | 0.12  | 0.38  | 0.66  | 0.57  | 0.34  | 0.33  |
| 14    | trans-β-Farnesene      | 1454               | 1456               | 0.43              | 0.33  | 0.32  | 0.31  | 0.30  | 0.22            | 0.29  | 0.41  | 0.06  | 0.36  | -     | -     | 0.30  | 0.30  |
| 15    | α-Humulene             | 1458               | 1454               | 6.26              | 7.24  | 7.56  | 7.20  | 7.23  | 7.79            | 7.38  | 7.74  | 10.57 | 7.87  | 8.50  | 7.83  | 6.07  | 6.86  |
| 16    | allo-Aromadendrene     | 1465               | 1460               | 0.50              | 0.47  | 0.50  | 0.46  | 0.46  | 0.39            | 0.41  | 0.70  | 0.20  | 0.43  | 0.51  | 0.71  | 0.41  | 0.40  |
| 17    | Cadina-1(6),4-diene    | 1477               | 1463               | 0.65              | 0.57  | 0.50  | 0.56  | 0.56  | 0.34            | 0.48  | 1.10  | 0.28  | 0.51  | 0.73  | 0.66  | 0.53  | 0.56  |
| 18    | γ-Murolene             | 1480               | 1479               | 3.02              | 2.98  | 3.46  | 2.97  | 2.99  | 3.74            | 3.08  | 3.85  | 1.06  | 3.07  | 3.78  | 4.15  | 2.35  | 2.89  |
| 19    | α-Amorphene            | 1484               | 1484               | 0.34              | 0.26  | 0.33  | 0.25  | 0.25  | -               | 0.29  | 0.37  | -     | -     | -     | -     | -     | -     |
| 20    | Germacrene D           | 1486               | 1481               | 1.34              | 1.66  | 2.73  | 1.74  | 1.71  | 2.00            | 2.46  | -     | -     | 1.85  | -     | 0.08  | 2.42  | 2.08  |
| 21    | 9-epi-β-Caryophyllene  | 1488               | 1466               | 0.62              | 0.56  | 0.69  | 0.55  | 0.54  | 0.55            | 0.53  | 0.60  | -     | 0.66  | 0.41  | 0.29  | 0.35  | 0.49  |
| 22    | β-Eudesmene            | 1492               | 1490               | 0.65              | 0.57  | 0.47  | 0.57  | 0.57  | 0.38            | 0.44  | 0.55  | 0.32  | 0.58  | 0.40  | 0.26  | 0.56  | 0.41  |
| 23    | Viridiflorene          | 1499               | 1496               | 1.58              | 1.49  | 1.64  | 1.50  | 1.49  | 1.96            | 1.57  | 1.63  | -     | 1.51  | 1.41  | -     | 1.46  | 1.58  |
| 24    | α-Selinene             | 1501               | 1498               | 0.61              | 0.59  | 0.52  | 0.57  | 0.57  | 0.55            | 0.46  | 0.61  | 0.31  | 0.59  | 0.54  | 0.40  | 0.54  | 0.45  |
| 25    | Bicyclogermacrene      | 1504               | 1500               | 0.10              | 0.11  | 0.22  | 0.14  | 0.13  | 0.15            | 0.22  | -     | -     | 0.14  | -     | -     | 0.16  | 0.18  |
| 26    | α-Murolene             | 1506               | 1500               | 1.40              | 0.98  | 1.18  | 0.98  | 0.99  | 0.75            | 1.01  | 2.18  | 0.19  | -     | 2.49  | 2.54  | 0.68  | 0.93  |
| 27    | β-Bisabolene           | 1513               | 1505               | 3.78              | 2.78  | 3.42  | 2.84  | 2.85  | 2.26            | 2.86  | 5.38  | 1.59  | 2.64  | 3.38  | 4.33  | 1.73  | 2.69  |
| 28    | β-Curcumene            | 1516               | 1515               | 0.17              | 0.10  | 0.18  | 0.14  | 0.14  | 0.19            | 0.12  | 0.27  | 0.12  | 0.17  | 0.17  | 0.10  | 0.10  | 0.13  |
| 29    | γ-Cadinene             | 1521               | 1513               | 1.43              | 0.95  | 1.57  | 1.20  | 1.21  | 2.09            | 1.36  | 1.94  | 0.66  | 1.35  | 1.71  | 1.90  | 0.97  | 1.33  |
| 30    | δ-Cadinene             | 1534               | 1523               | 5.61              | 4.41  | 5.65  | 4.62  | 4.64  | 6.15            | 0.17  | 0.24  | 2.46  | 4.88  | 6.54  | 6.82  | 3.94  | 5.02  |
| 31    | trans-Cadina-1,4-diene | 1541               | 1534               | 0.19              | 0.11  | 0.15  | 0.12  | 0.13  | 0.19            | 0.14  | 0.36  | 0.07  | 0.13  | 0.25  | 0.20  | 0.11  | 0.14  |
| 32    | α-Cadinene             | 1546               | 1538               | 0.33              | 0.33  | 0.42  | 0.33  | 0.32  | 0.52            | 0.30  | 0.41  | 0.16  | 0.32  | 0.37  | 0.30  | 0.27  | 0.33  |
| 33    | trans-γ-Bisabolene     | 1550               | 1531               | 0.33              | 0.21  | 0.27  | 0.21  | 0.20  | 0.17            | 0.22  | 0.49  | 0.12  | 0.21  | 0.27  | 0.27  | 0.12  | 0.22  |
| 34    | Selina-3,7(11)-diene   | 1551               | 1564               | -                 | 0.13  | 0.17  | 0.13  | 0.12  | 0.12            | 0.16  | -     | -     | -     | 0.29  | -     | 0.11  | 0.17  |
| 35    | Caryophyllenyl alcohol | 1578               | 1572               | 0.14              | 0.14  | 0.19  | 0.14  | 0.14  | 0.26            | 0.18  | 0.20  | 0.11  | 0.20  | 0.24  | 0.08  | 0.09  | 0.19  |
| 36    | Caryophyllene oxide    | 1590               | 1583               | 0.22              | 0.23  | 0.18  | 0.21  | 0.23  | 0.27            | 0.54  | 0.24  | 0.31  | 0.27  | 0.94  | 0.89  | 0.13  | 0.37  |
| 37    | Gleenol                | 1619               | 1587               | 0.22              | 0.17  | 0.13  | 0.16  | 0.17  | 0.11            | 0.22  | 0.23  | 0.09  | 0.15  | 0.23  | 0.25  | -     | 0.23  |
| 38    | Junenol                | 1627               | 1619               | 0.31              | 0.13  | 0.25  | 0.10  | 0.14  | 0.62            | 0.26  | 0.55  | 0.10  | 0.15  | 0.55  | 0.27  | 0.09  | 0.25  |
| 39    | τ-MuuroloI             | 1652               | 1642               | 0.16              | 0.06  | 0.12  | 0.06  | 0.07  | 0.49            | 0.12  | 0.28  | 0.03  | 0.09  | 0.34  | 0.13  | 0.06  | -     |
| 40    | δ-Cadinol              | 1657               | 1646               | 0.12              | 0.04  | 0.09  | 0.05  | 0.05  | 0.50            | 0.10  | 0.20  | 0.09  | 0.07  | 0.26  | 0.08  | 0.03  | 0.09  |
| 41    | α-Cadinol              | 1686               | 1654               | 0.23              | 0.19  | 0.13  | 0.16  | 0.16  | 0.10            | 0.19  | 0.24  | 0.07  | 0.15  | 0.20  | 0.24  | 0.17  | 0.23  |
| 42    | Eudesm-7(11)-en-4-ol   | 1691               | 1700               | 0.14              | 0.24  | 0.25  | 0.21  | 0.21  | 0.60            | 0.17  | 0.13  | 0.10  | 0.20  | 0.07  | 0.09  | 0.16  | 0.19  |
| 43    | 16-Kaurene             | 2035               | 2043               | -                 | -     | -     | -     | -     | 0.22            | -     | -     | -     | -     | -     | -     | -     | -     |
| 44    | Manool                 | 2038               | 2057               | -                 | -     | -     | -     | -     | 0.14            | -     | -     | -     | -     | -     | -     | -     | -     |
| 45    | Kolavelool             | 2043               | -                  | -                 | -     | -     | -     | -     | 1.34            | -     | -     | -     | -     | -     | -     | -     | -     |
| 46    | Kolavenol              | 2323               | 2297               | -                 | -     | -     | -     | -     | 1.07            | -     | -     | -     | -     | -     | -     | -     | -     |
| 47    | Methyl kolavenate      | 2395               | -                  | -                 | -     | -     | -     | -     | 0.06            | -     | -     | -     | -     | -     | -     | -     | -     |
| Total |                        |                    |                    | 97.37             | 97.90 | 98.16 | 98.50 | 98.43 | 94.48           | 92.97 | 90.04 | 95.91 | 96.19 | 96.37 | 95.07 | 96.90 | 95.28 |

Table S1 Continue...

| No.   | Compound*              | RRI <sup>Cal</sup> | RRI <sup>Lit</sup> | 629             | 630   | 863   | 865   | 871   | 873   | 878   | 880   | 888                                 | 889   | 890   | 891   | 892   |
|-------|------------------------|--------------------|--------------------|-----------------|-------|-------|-------|-------|-------|-------|-------|-------------------------------------|-------|-------|-------|-------|
|       |                        |                    |                    | Unknown Samples |       |       |       |       |       |       |       | Unknown Samples with Known Location |       |       |       |       |
| 1     | δ-Elemene              | 1342               | 1338               | 1.43            | 0.86  | 0.42  | 0.86  | 1.28  | 0.77  | 0.88  | -     | 0.31                                | 0.30  | 0.31  | 0.06  | 0.05  |
| 2     | α-Cubebene             | 1355               | 1351               | 0.57            | 0.09  | 0.43  | 1.25  | 1.71  | 0.76  | 0.92  | -     | 0.26                                | 0.33  | 0.48  | 0.20  | 0.24  |
| 3     | α-Ylangene             | 1379               | 1375               | 0.24            | 0.51  | 0.11  | 0.15  | 0.20  | 0.16  | 0.17  | 0.29  | 0.06                                | 0.06  | 0.05  | 0.04  | 0.04  |
| 4     | α-Copaene              | 1384               | 1376               | 9.90            | 7.45  | 6.14  | 7.24  | 8.57  | 7.51  | 8.87  | 11.20 | 5.96                                | 5.72  | 5.93  | 5.32  | 5.16  |
| 5     | 7-epi-Sesquithujene    | 1395               | 1391               | 0.22            | 0.19  | 0.07  | 0.26  | 0.26  | 0.31  | 0.17  | 1.95  | 0.23                                | 0.24  | 0.24  | 0.24  | 0.26  |
| 6     | β-Elemene              | 1399               | 1390               | 1.74            | 1.29  | 0.98  | 1.48  | 1.70  | 1.49  | 1.73  | -     | 1.36                                | 1.33  | 1.41  | 1.13  | 1.14  |
| 7     | Cyperene               | 1409               | 1398               | 0.73            | 0.64  | 0.51  | 0.65  | 0.62  | 0.49  | 0.62  | 0.72  | 0.38                                | 0.38  | 0.40  | 0.26  | 0.25  |
| 8     | α-Cedrene              | 1419               | 1411               | 0.21            | 0.17  | 0.09  | 0.20  | 0.18  | -     | 0.21  | 0.21  | -                                   | 0.22  | 0.23  | 0.31  | 0.32  |
| 9     | β-Caryophyllene        | 1427               | 1419               | 49.92           | 40.96 | 40.66 | 42.23 | 41.23 | 40.91 | 38.83 | 39.07 | 38.50                               | 38.25 | 37.20 | 12.57 | 11.61 |
| 10    | cis-β-Copaene          | 1433               | 1432               | 0.57            | 0.67  | 0.14  | 0.22  | 0.19  | 0.21  | 0.23  | 0.31  | 0.07                                | 0.09  | 0.08  | 0.04  | 0.05  |
| 11    | γ-Elemene              | 1435               | 1436               | 1.74            | 1.53  | -     | 1.70  | 1.81  | 2.18  | 2.00  | 1.54  | -                                   | -     | -     | -     | -     |
| 12    | trans-α-Bergamotene    | 1437               | 1434               | 7.84            | 6.20  | 4.49  | 8.28  | 7.22  | 8.94  | 8.70  | 7.67  | 9.68                                | 11.61 | 11.22 | 14.24 | 13.75 |
| 13    | Aromandendrene         | 1443               | 1441               | 0.36            | 0.67  | 0.45  | 0.48  | 0.42  | 0.27  | 0.46  | 0.49  | 0.27                                | 0.32  | 0.37  | 0.34  | 0.32  |
| 14    | trans-β-Farnesene      | 1454               | 1442               | 0.23            | 0.19  | 0.19  | 0.21  | 0.18  | 0.13  | 0.46  | 0.27  | 0.44                                | 0.45  | 0.48  | 0.59  | 0.60  |
| 15    | α-Humulene             | 1458               | 1454               | 7.73            | 8.90  | 7.73  | 7.47  | 7.25  | 7.76  | 6.69  | 6.23  | 7.09                                | 6.84  | 7.06  | 1.94  | 1.91  |
| 16    | allo-Aromadendrene     | 1465               | 1460               | 0.45            | 0.57  | 0.53  | 0.48  | 0.49  | 0.39  | 0.57  | 0.50  | 0.39                                | 0.38  | 0.38  | 0.45  | 0.46  |
| 17    | Cadina-1(6),4-diene    | 1477               | 1463               | 0.69            | 0.81  | 0.78  | 0.32  | 0.25  | 0.18  | 0.52  | 0.30  | 0.47                                | 0.42  | 0.39  | 0.21  | 0.18  |
| 18    | γ-Murolene             | 1480               | 1479               | 2.31            | 3.92  | 3.72  | 4.06  | 3.81  | 2.97  | 3.31  | 3.21  | 2.85                                | 2.75  | 2.89  | 1.85  | 1.81  |
| 19    | α-Amorphene            | 1484               | 1482               | -               | 0.47  | -     | -     | -     | -     | 0.32  | -     | 0.32                                | 0.30  | 0.32  | -     | -     |
| 20    | Germacrene D           | 1486               | 1481               | 0.22            | -     | 0.54  | 0.95  | 1.09  | -     | 2.38  | 0.77  | -                                   | -     | 0.12  | -     | -     |
| 21    | 9-epi-β-Caryophyllene  | 1488               | 1466               | 0.36            | 0.51  | 0.29  | 0.72  | 0.64  | 0.64  | 0.76  | 0.64  | 1.14                                | 1.09  | 1.20  | 2.74  | -     |
| 22    | β-Eudesmene            | 1492               | 1490               | 0.27            | 0.45  | 0.42  | 0.47  | 0.52  | 0.35  | 0.97  | 0.66  | 1.67                                | 1.59  | 1.68  | 2.36  | 2.28  |
| 23    | Viridiflorene          | 1500               | 1500               | 1.20            | 1.42  | 2.01  | -     | -     | -     | 1.62  | -     | 0.56                                | 0.54  | -     | -     | -     |
| 24    | α-Selinene             | 1501               | 1498               | 0.35            | 0.51  | 0.61  | 0.59  | 0.60  | 0.44  | 1.02  | 0.64  | 1.39                                | 1.32  | 1.42  | 2.15  | 2.06  |
| 25    | Bicyclogermacrene      | 1504               | 1500               | -               | -     | 0.08  | -     | -     | -     | -     | -     | -                                   | -     | -     | -     | 0.06  |
| 26    | α-Murolene             | 1506               | 1500               | 1.17            | 2.45  | 1.00  | 1.31  | 1.32  | 1.15  | 1.30  | 1.47  | 1.15                                | 1.09  | 1.14  |       |       |
| 27    | β-Bisabolene           | 1513               | 1505               | 1.80            | 3.60  | 2.84  | 3.41  | 3.51  | 3.19  | 4.64  | 3.79  | 7.33                                | 6.96  | 7.25  | 8.43  | 10.10 |
| 28    | β-Curcumene            | 1516               | 1515               | 0.12            | 0.19  | 0.08  | 0.16  | 0.14  | 0.24  | 0.18  | 0.16  |                                     | 0.19  | 0.31  | 0.75  | 0.89  |
| 29    | γ-Cadinene             | 1521               | 1513               | 0.81            | 1.80  | 1.85  | 1.82  | 1.84  | 1.75  | 1.49  | 1.53  | 1.57                                | 1.46  | 1.53  | 4.25  | 4.88  |
| 30    | δ-Cadinene             | 1534               | 1523               | 3.57            | 6.91  | 6.08  | 5.89  | 5.87  | 5.53  | 5.57  | 5.32  | 5.22                                | 4.95  | 5.02  | 7.28  | 7.13  |
| 31    | trans-Cadina-1,4-diene | 1541               | 1534               | 0.11            | 0.28  | 0.11  | 0.19  | 0.19  | 0.19  | 0.16  | 0.22  | 0.16                                | 0.16  | 0.16  | 0.16  | 0.16  |
| 32    | α-Cadinene             | 1546               | 1538               | 0.17            | 0.39  | 0.59  | 0.50  | 0.49  | 0.40  | 0.37  | 0.34  | -                                   | -     | -     | 0.17  | 0.14  |
| 33    | trans-γ-Bisabolene     | 1550               | 1531               | 0.10            | 0.29  | 0.21  | 0.29  | 0.31  | 0.22  | 0.40  | 0.34  | 0.80                                | 0.78  | 0.81  | 1.73  | 1.42  |
| 34    | Selina-3,7(11)-diene   | 1551               | 1564               | -               | -     | 0.35  | 0.19  | 0.25  | 0.34  | 0.17  |       | 0.41                                | 0.36  | 0.30  | 0.50  | 0.37  |
| 35    | Caryophyllenyl alcohol | 1578               | 1572               | 0.10            | 0.24  | 0.58  | 0.21  | 0.20  | 0.36  | 0.15  | 0.13  | 0.26                                | 0.25  | 0.26  | 0.12  | 0.16  |
| 36    | Caryophyllene oxide    | 1590               | 1583               |                 | 0.51  | 1.97  | 0.26  | 0.73  | 3.53  | 0.18  | 0.23  | 0.37                                | 0.35  | 0.36  | 0.18  | 0.16  |
| 37    | Gleenol                | 1619               | 1587               | 0.22            | 0.20  | 0.10  | 0.20  | 0.25  | 0.35  | 0.15  | 0.26  | 0.31                                | 0.28  | 0.22  | 0.34  | 0.34  |
| 38    | Junenol                | 1627               | 1619               | 0.10            | 0.55  | 0.99  | 0.26  | 0.35  | 0.36  | 0.24  | 0.34  | 0.41                                | 0.37  | 0.38  | 0.70  | 0.74  |
| 39    | τ-MuuroloI             | 1652               | 1642               | 0.06            | 0.35  | 0.73  | 0.14  | -     | 0.20  | 0.12  | 0.17  | 0.34                                | 0.35  | 0.34  | 0.11  | 0.13  |
| 40    | δ-Cadinol              | 1657               | 1646               | 0.04            | -     | 0.66  | 0.09  | 0.13  | 0.20  | 0.09  | 0.12  | 0.58                                | 0.55  | 0.57  | 0.12  | 0.14  |
| 41    | α-Cadinol              | 1686               | 1654               | 0.23            | 0.18  | 0.10  | 0.14  | 0.17  | 0.25  | 0.15  | 0.19  | 0.21                                | 0.19  | 0.16  | 0.18  | 0.19  |
| 42    | Eudesm-7(11)-en-4-ol   | 1691               | 1685               | 0.10            | 0.08  | 0.50  | 0.37  | 0.34  | 0.32  | 0.21  | 0.19  | 0.48                                | 0.41  | 0.45  | -     | -     |
| 43    | 16-Kaurene             | 2035               | 2043               | -               | -     | -     | -     | -     | -     | -     | -     | 0.09                                | 0.07  | 0.09  | 0.40  | 0.40  |
| 44    | Manool                 | 2038               | 2057               | -               | -     | 0.33  | -     | -     | -     | -     | -     | 0.11                                | 0.08  | 0.11  | 0.07  | 0.05  |
| 45    | Kolavelool             | 2043               | -                  | -               | -     | 1.05  | -     | -     | -     | -     | -     | 0.11                                | 0.08  | 0.11  | 0.02  | 0.03  |
| 46    | Kolavenol              | 2323               | 2297               | -               | -     | 0.52  | -     | -     | -     | -     | -     | -                                   | -     | -     | 0.34  | 0.33  |
| 47    | Methyl kolavenate      | 2395               | -                  | -               | -     | 0.52  | -     | -     | -     | -     | -     | 0.04                                | 0.07  | 0.10  | 0.06  | 0.05  |
| Total |                        |                    |                    | 97.98           | 97.00 | 92.55 | 95.70 | 96.31 | 95.44 | 97.98 | 91.47 | 93.35                               | 93.53 | 93.53 | 72.95 | 70.36 |

Table S1 Continue...

| No.                                 | Compound*              | RRI <sup>Cal</sup> | RRI <sup>Lit</sup> | 893   | 894   | 895   | 896   | 897   | 898   | 899   | 619                           | 620  | 628   | 862   | 874  | 877   |
|-------------------------------------|------------------------|--------------------|--------------------|-------|-------|-------|-------|-------|-------|-------|-------------------------------|------|-------|-------|------|-------|
| Unknown Samples with Known Location |                        |                    |                    |       |       |       |       |       |       |       | Sample from Commercial Source |      |       |       |      |       |
| 1                                   | δ-Elmene               | 1342               | 1338               | 0.06  | 0.18  | 0.17  | 0.18  | 0.72  | 0.96  | 0.89  | 0.05                          | -    | 0.07  | 0.07  | -    | 0.06  |
| 2                                   | α-Cubebene             | 1355               | 1351               | 0.23  | 0.59  | 0.54  | 0.54  | 0.25  | 0.26  | 0.29  | 0.03                          | -    | 4.65  | -     | -    | 0.02  |
| 3                                   | α-Ylangene             | 1379               | 1375               | 0.04  | 0.09  | 0.08  | 0.09  | 0.13  | 0.16  | 0.13  | 0.15                          | -    | 0.01  | 0.15  | -    | 0.18  |
| 4                                   | α-Copaene              | 1384               | 1376               | 5.13  | 5.35  | 5.28  | 5.29  | 3.55  | 3.86  | 3.56  | 0.57                          | -    | 32.93 | 1.27  | 0.28 | 0.63  |
| 5                                   | 7-epi-Sesquithujene    | 1395               | 1391               | 0.25  | 0.21  | 0.22  | 0.22  | 0.08  | 0.09  | 0.07  | 0.16                          | -    | 0.01  | 0.08  | -    | 0.08  |
| 6                                   | β-Elmene               | 1399               | 1390               | 1.13  | 1.15  | 1.10  | 1.14  | 1.53  | 1.64  | 1.52  | 0.61                          | -    | 6.20  | 1.06  | -    | 0.65  |
| 7                                   | Cyperene               | 1409               | 1398               | 0.26  | 0.45  | 0.45  | 0.45  | 0.44  | 0.49  | 0.45  | -                             | -    | 0.02  | -     | -    | -     |
| 8                                   | α-Cedrene              | 1419               | 1411               | 0.31  | -     | -     | 0.22  | 0.08  | 0.08  | 0.07  | 0.03                          | -    | -     | -     | -    | -     |
| 9                                   | β-Caryophyllene        | 1427               | 1419               | 12.10 | 40.26 | 40.23 | 39.99 | 54.77 | 56.87 | 53.74 | 39.06                         | -    | 9.07  | 33.66 | -    | 43.40 |
| 10                                  | cis-β-Copaene          | 1433               | 1432               | 0.05  | 0.15  | 0.14  | 0.14  | 0.09  | 0.09  | 0.08  | 0.02                          | -    | 0.03  | 0.05  | -    | 0.05  |
| 11                                  | γ-Elmene               | 1435               | 1436               | -     | -     | -     | -     | 0.96  | 0.61  | 0.95  | -                             | -    | -     | -     | -    | -     |
| 12                                  | trans-α-Bergamotene    | 1437               | 1434               | 13.65 | 9.73  | 9.64  | 9.61  | 2.66  | 2.29  | 2.66  | 5.52                          | -    | 0.08  | 5.18  | -    | 6.09  |
| 13                                  | Aromandendrene         | 1443               | 1441               | 0.32  | 0.54  | 0.52  | 0.40  | 0.15  | 0.13  | 0.16  | -                             | -    | 0.08  | 0.03  | -    | 0.06  |
| 14                                  | trans-β-Farnesene      | 1454               | 1442               | 0.60  | 0.34  | 0.33  | 0.30  | 0.05  | 0.04  | 0.05  | 0.18                          | -    | 0.06  | 0.13  | -    | 0.20  |
| 15                                  | α-Humulene             | 1458               | 1454               | 1.91  | 7.26  | 7.20  | 7.10  | 10.37 | 8.93  | 10.38 | 7.52                          | -    | 1.08  | 5.00  | -    | 7.84  |
| 16                                  | allo-Aromadendrene     | 1465               | 1460               | 0.45  | 0.42  | 0.38  | 0.40  | 0.23  | 0.20  | -     | -                             | -    | 2.95  | -     | -    | -     |
| 17                                  | Cadina-1(6),4-diene    | 1477               | 1463               | 0.19  | 0.35  | 0.36  | 0.35  | 0.21  | 0.18  | 0.22  | 0.05                          | -    | 0.19  | -     | -    | 0.03  |
| 18                                  | γ-Murolene             | 1480               | 1479               | 1.80  | 3.96  | 4.01  | 3.94  | 2.95  | 2.48  | 2.91  | 0.24                          | -    | 0.63  | 0.29  | -    | 0.25  |
| 19                                  | α-Amorphene            | 1484               | 1482               | -     | -     | -     | -     | -     | -     | -     | 0.10                          | -    | 0.04  | -     | -    | -     |
| 20                                  | Germacrene D           | 1486               | 1481               | -     | 0.72  | 0.24  | 0.44  | 0.05  | -     | 0.06  | -                             | -    | 1.96  | -     | -    | -     |
| 21                                  | 9-epi-β-Caryophyllene  | 1488               | 1466               | -     | 0.89  | 0.88  | 0.90  | 0.17  | 0.13  | 0.15  | 0.38                          | -    | 0.15  | 0.69  | -    | 0.37  |
| 22                                  | β-Eudesmene            | 1492               | 1490               | 2.26  | 0.74  | 0.74  | 0.75  | 0.48  | 0.41  | 0.46  | 0.71                          | -    | 11.04 | 1.96  | 0.05 | 0.74  |
| 23                                  | Viridiflorene          | 1500               | 1500               | -     | -     | -     | -     | -     | -     | -     | 0.19                          | -    | -     | -     | -    | -     |
| 24                                  | α-Selinene             | 1501               | 1498               | 2.07  | 0.91  | 0.91  | 0.93  | 0.41  | 0.35  | 0.41  | 0.45                          | -    | 6.19  | 1.26  | -    | 0.46  |
| 25                                  | Bicyclogermacrene      | 1504               | 1500               | -     | -     | -     | -     | -     | -     | -     | 0.28                          | -    | -     | 0.43  | -    | 0.25  |
| 26                                  | α-Murolene             | 1506               | 1500               | 1.90  | 1.15  | 1.12  | 1.14  | 0.60  | 0.52  | 0.59  | 0.29                          | -    | 0.44  | -     | -    | 0.22  |
| 27                                  | β-Bisabolene           | 1513               | 1505               | 10.11 | 4.51  | 4.50  | 4.49  | 0.72  | 0.63  | 0.72  | 8.30                          | -    | -     | 9.31  | -    | 7.12  |
| 28                                  | β-Curcumene            | 1516               | 1515               | 0.91  | 0.25  | 0.26  | 0.26  | 0.06  | 0.06  | 0.07  | 0.35                          | -    | -     | 0.51  | -    | 0.32  |
| 29                                  | γ-Cadinene             | 1521               | 1513               | 4.85  | 2.16  | 2.24  | 2.22  | 1.63  | 1.44  | 1.63  | 7.24                          | -    | 0.73  | 6.91  | -    | 6.98  |
| 30                                  | δ-Cadinene             | 1534               | 1523               | 7.10  | 6.30  | 6.49  | 6.39  | 4.52  | 3.99  | 4.50  | 1.09                          | -    | 8.10  | 1.65  | -    | 1.26  |
| 31                                  | trans-Cadina-1,4-diene | 1541               | 1534               | 0.16  | 0.19  | 0.20  | 0.20  | 0.10  | 0.09  | 0.10  | -                             | -    | 0.31  | 0.02  | -    | 0.01  |
| 32                                  | α-Cadinene             | 1546               | 1538               | -     | 0.62  | 0.65  | 0.65  | 0.69  | -     | -     | 0.68                          | -    | 0.02  | -     | -    | -     |
| 33                                  | trans-γ-Bisabolene     | 1550               | 1531               | 1.71  | 0.47  | 0.45  | 0.48  | -     | -     | -     | 0.21                          | -    | -     | 0.28  | -    | 0.43  |
| 34                                  | Selina-3,7(11)-diene   | 1551               | 1564               | 0.53  | 0.29  | 0.32  | 0.31  | 0.94  | 1.11  | 0.91  | -                             | -    | -     | 0.10  | -    | -     |
| 35                                  | Caryophyllenyl alcohol | 1578               | 1572               | 0.14  | 0.33  | 0.41  | 0.42  | 0.75  | 0.81  | 0.75  | 0.11                          | -    | 0.03  | 0.05  | -    | 0.11  |
| 36                                  | Caryophyllene oxide    | 1590               | 1583               | 0.18  | 0.25  | 0.28  | 0.29  | 0.34  | -     | -     | 1.03                          | -    | 0.62  | 0.72  | -    | 1.45  |
| 37                                  | Gleenol                | 1619               | 1587               | 0.31  | 0.17  | 0.19  | 0.19  | 0.17  | -     | 0.16  | 0.02                          | -    | 0.11  | -     | -    | -     |
| 38                                  | Junenol                | 1627               | 1619               | 0.69  | 0.41  | 0.40  | 0.42  | 0.49  | 0.53  | 0.47  | 1.11                          | -    | 0.01  | -     | -    | 0.19  |
| 39                                  | τ-Murolol              | 1652               | 1642               | 0.11  | 0.79  | 0.77  | 0.78  | 0.45  | 0.54  | 0.47  | -                             | -    | 0.40  | 0.03  | -    | 0.02  |
| 40                                  | δ-Cadinol              | 1657               | 1646               | 0.13  | 0.72  | 0.69  | 0.73  | 0.57  | 0.66  | 0.58  | 0.01                          | -    | 0.07  | -     | -    | 0.01  |
| 41                                  | α-Cadinol              | 1686               | 1654               | 0.17  | 0.11  | 0.13  | 0.12  | 0.10  | 0.16  | 0.11  | -                             | -    | -     | 0.03  | -    | 0.01  |
| 42                                  | Eudesm-7(11)-en-4-ol   | 1691               | 1685               | -     | 0.67  | 0.70  | 0.70  | 0.56  | 0.64  | 0.57  | -                             | -    | 0.05  | 0.06  | -    | 0.06  |
| 43                                  | 16-Kaurene             | 2035               | 2043               | 0.39  | 0.06  | -     | 0.07  | 0.10  | 0.11  | 0.11  | -                             | -    | 0.15  | -     | -    | -     |
| 44                                  | Manool                 | 2038               | 2057               | 0.06  | -     | -     | 0.01  | -     | 0.01  | -     | -                             | -    | -     | -     | -    | -     |
| 45                                  | Kolavelool             | 2043               | -                  | 0.03  | -     | -     | -     | -     | -     | -     | -                             | -    | -     | -     | -    | -     |
| 46                                  | Kolavenol              | 2323               | 2297               | -     | 0.14  | 0.14  | 0.14  | -     | -     | 0.14  | -                             | -    | 0.18  | -     | -    | -     |
| 47                                  | Methyl kolavenate      | 2395               | -                  | 0.03  | -     | 0.02  | -     | -     | 0.02  | -     | 2.47                          | -    | 3.68  | -     | -    | 1.67  |
| Total                               |                        |                    |                    | 72.32 | 93.88 | 93.38 | 93.39 | 93.12 | 91.57 | 91.09 | 79.21                         | 0.00 | 92.34 | 70.98 | 0.33 | 81.22 |

\*: Names of compound were provided according to the NIST mass spectral library. The isomer was specified when possible.

RRI<sup>Cal</sup>: relative retention indices calculated against n-alkane.RRI<sup>Lit</sup>: relative retention indices data from literature.

-: compound not detected or only contain trace amount.
